# Supplementary material for: B-cell repertoire dynamics after sequential hepatitis B vaccination and evidence for cross-reactive B-cell activation
Source: PubMed Central journal article supplement (PMC4910312; doi:10.1186/s13073-016-0322-z), 2016-06-16
Supplement: 13073_2016_322_MOESM1_ESM.pdf [file 13073_2016_322_MOESM1_ESM.pdf]

## Supplementary figures and tables

### Galson *et al.* B cell repertoire dynamics after sequential Hepatitis B vaccination, and evidence for cross-reactive B cell activation

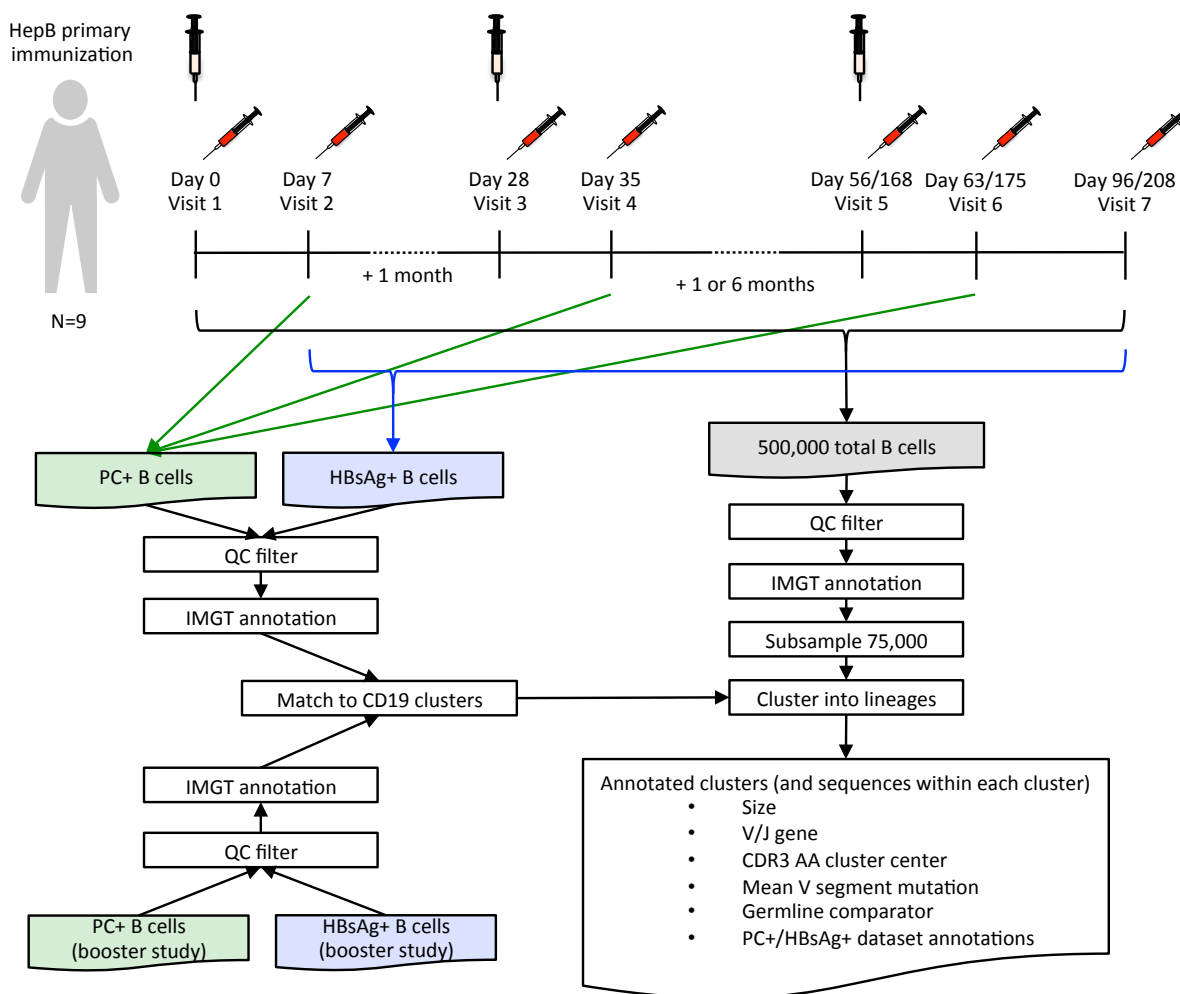

**Figure S1. Schematic of study design, and initial sequence processing pipeline.** Nine participants were given a three dose primary course of HepB immunization. Five participants were given the conventional schedule (month 0, 1 & 2), and four participants an accelerated schedule (month 0, 1 & 7). Blood was taken on the day of each vaccine, 7 days after each vaccine, and one month after the final vaccine. IgG transcripts from 500,000 total B cells were sequenced at each timepoint. Sequences were submitted to IMGT for annotation, and clustered into clonal lineages. PC's were sorted and sequenced at the day 7 visits, and HBsAg+ B cells were sorted and sequenced on visits 2-7. Sequences from the HBsAg+ and PC's were used to find clusters in the total repertoire that were enriched for specificity towards the vaccine. In addition, sequences from HBsAg+ and PC's from a previous HepB booster vaccine study conducted in our lab [2] were used to find further clusters in the total repertoire that were enriched for specificity towards the vaccine.

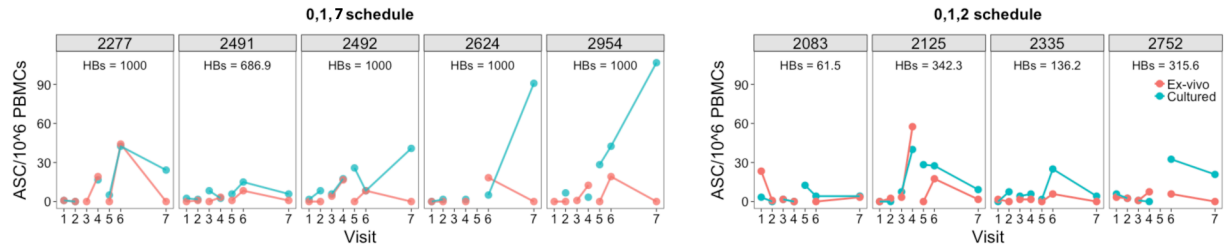

**Figure S2. HBsAg-specific B cell response kinetics determined by ELISpot for each individual participant.** PBMC's are used ex-vivo to detect PCs, and are cultured to detect memory cells. Note that some points are missing due to either assay failure, or insufficient blood volume collected for the sample. The number at the top of each plot shows the anti-HBsAg antibody concentration at the end of the study for that participant.

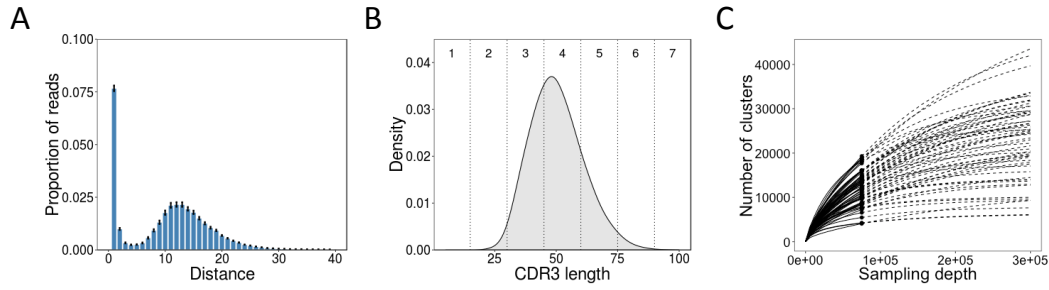

**Figure S3. Determining clustering thresholds, and performing rarefaction.** (A) Nearest neighbor distribution of CDR3 nucleotide sequences before clustering. For each sample, the nearest neighbor of each sequence was determined by comparing it to every other sequence of the same length in the dataset to find the closest match. The distance is the number of nucleotide differences between the sequence and its nearest neighbor. Distributions were calculated from all samples, and mean values  $\pm$  SEM plotted. (B) Density plot showing the distribution of CDR3 nucleotide sequences of different lengths in the dataset. The horizontal lines show where the length-based clustering cutoffs are (1 mismatch per 15 nucleotides), and the number between each line is indicative of the maximum number of mismatches that are allowed between sequences of that length to be considered part of the same cluster. (C) Extrapolated rarefaction curves generated from the clustered dataset for each sample. Rarefaction was conducted by subsampling data without replacement at 1,000 sequence increments, and determining the number of clusters represented by these sequences (solid line). Extrapolation (dotted line) was based on Chao's estimator formula, and conducted up to a depth of 300,000 sequences.

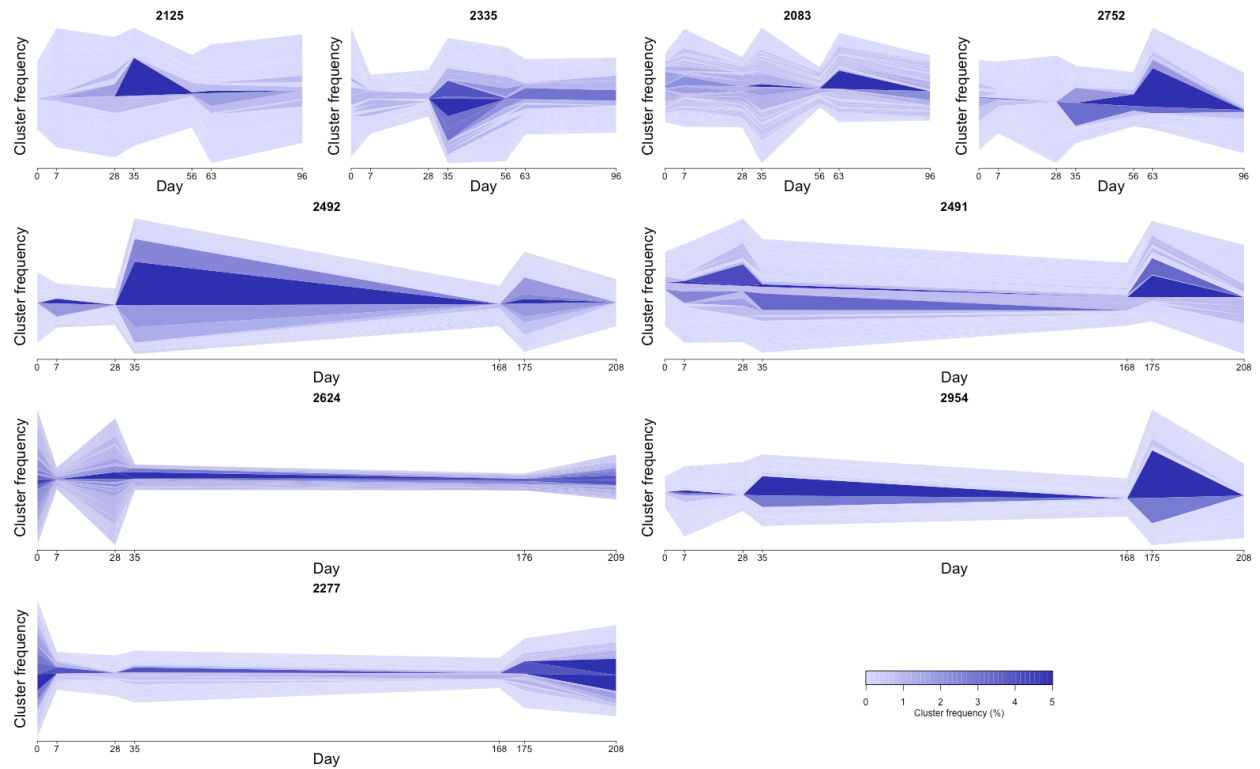

**Figure S3. Cluster kinetics plots for the total repertoire.** For each participant, the 200 most frequent clusters are found. At each day, the frequencies of these clusters are plotted as a stacked bar chart, centered to the middle of the y axis. Clusters from each day are then joined using a horizontal stream to illustrate how the frequency of the clusters changes over time. The width and darkness of the stream represents the frequency of the cluster at that time. The top four plots are from participants who were given the accelerated vaccine schedule, and the bottom five plots are from participants who were given the conventional vaccine schedule.

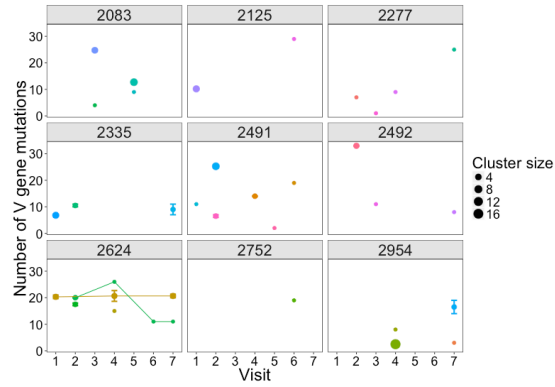

**Figure S4. Identification of HBsAg-specific sequences from the literature in our dataset.** Previously described sequences were mapped to our dataset to see which clusters they would fall into based on CDR3 AA sequence identity (Table S3). Shown are visits when these clusters are present in each participant. Size of the spot indicates the number of sequences in the cluster at that timepoint, and the position on the y axis indicates the mean mutation of the sequences within the cluster at that timepoint. Where there were multiple sequences in the cluster, error bars showing  $\pm$  SEM of the mutation were plotted.

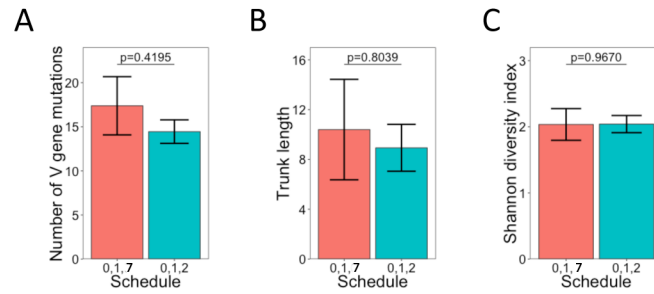

**Figure S5. Differences in the properties of the visit 6 vaccine-specific clusters in the two vaccine groups.** Differences between the two vaccine groups were investigated for the third vaccine only, which was given at a different time for the two groups. (A) The clusters unique to visit 6 were identified, and the mean number of V gene mutations of these clusters determined. In addition, lineage trees were then constructed for each of these clusters where there were at least 25 sequences, and trunk length (B), and sequence diversity within the lineage (C) calculated. Shown are the mean values  $\pm$  SEM. Comparisons were performed using the Mann-Whitney U test.

**Table S1. Summary of sequence data obtained from total B cell samples.**

| <b>Participant ID</b> | <b>Visit</b> | <b>Day</b> | <b>Cell number</b> | <b>Raw sequences</b> | <b>Filtered sequences</b> | <b>Subsampled sequences</b> | <b>Clusters</b> |
|-----------------------|--------------|------------|--------------------|----------------------|---------------------------|-----------------------------|-----------------|
| 2125                  | 1            | 0          | 500000             | 280250               | 109983                    | 75000                       | 9749            |
| 2125                  | 2            | 7          | 500000             | 248724               | 91470                     | 75000                       | 6574            |
| 2125                  | 3            | 28         | 400000             | 271568               | 107778                    | 75000                       | 8378            |
| 2125                  | 4            | 35         | 480000             | 282535               | 106228                    | 75000                       | 10900           |
| 2125                  | 5            | 56         | 440000             | 240033               | 88508                     | 75000                       | 15931           |
| 2125                  | 6            | 63         | 480000             | 273632               | 96988                     | 75000                       | 14404           |
| 2125                  | 7            | 96         | 500000             | 314920               | 106679                    | 75000                       | 10009           |
| 2335                  | 1            | 0          | 500000             | 326107               | 123059                    | 75000                       | 5467            |
| 2335                  | 2            | 7          | 500000             | 265573               | 95504                     | 75000                       | 7579            |
| 2335                  | 3            | 28         | 500000             | 295070               | 110753                    | 75000                       | 8885            |
| 2335                  | 4            | 35         | 500000             | 292074               | 109891                    | 75000                       | 8556            |
| 2335                  | 5            | 56         | 500000             | 297512               | 115352                    | 75000                       | 9969            |
| 2335                  | 6            | 63         | 500000             | 278008               | 105298                    | 75000                       | 12329           |
| 2335                  | 7            | 96         | 500000             | 292518               | 100159                    | 75000                       | 11578           |
| 2083                  | 1            | 0          | 500000             | 285665               | 101829                    | 75000                       | 7804            |
| 2083                  | 2            | 7          | 80000              | 289428               | 107976                    | 75000                       | 12502           |
| 2083                  | 3            | 28         | 500000             | 316854               | 110819                    | 75000                       | 14668           |
| 2083                  | 4            | 35         | 360000             | 287595               | 106748                    | 75000                       | 7593            |
| 2083                  | 5            | 56         | 500000             | 290731               | 96961                     | 75000                       | 18166           |
| 2083                  | 6            | 63         | 240000             | 305533               | 110727                    | 75000                       | 18754           |
| 2083                  | 7            | 96         | 440000             | 241392               | 75872                     | 75000                       | 18763           |
| 2752                  | 1            | 0          | 500000             | 329479               | 126338                    | 75000                       | 8302            |
| 2752                  | 2            | 7          | 500000             | 341075               | 129083                    | 75000                       | 10572           |
| 2752                  | 3            | 28         | 500000             | 307994               | 110134                    | 75000                       | 9779            |
| 2752                  | 4            | 35         | 500000             | 341418               | 124074                    | 75000                       | 12132           |
| 2752                  | 5            | 56         | 500000             | 332007               | 125062                    | 75000                       | 16027           |
| 2752                  | 6            | 63         | 500000             | 287170               | 105604                    | 75000                       | 14988           |
| 2752                  | 7            | 96         | 500000             | 345096               | 122024                    | 75000                       | 11520           |
| 2492                  | 1            | 0          | 200000             | 325226               | 130221                    | 75000                       | 9588            |
| 2492                  | 2            | 7          | 280000             | 342157               | 122949                    | 75000                       | 13864           |
| 2492                  | 3            | 28         | 360000             | 348220               | 114600                    | 75000                       | 14119           |
| 2492                  | 4            | 35         | 500000             | 337566               | 134155                    | 75000                       | 4081            |
| 2492                  | 5            | 168        | 500000             | 322941               | 117357                    | 75000                       | 16067           |
| 2492                  | 6            | 175        | 500000             | 332830               | 123540                    | 75000                       | 8745            |
| 2492                  | 7            | 208        | 500000             | 302128               | 102733                    | 75000                       | 11150           |

|      |   |     |        |        |        |       |       |
|------|---|-----|--------|--------|--------|-------|-------|
| 2491 | 1 | 0   | 500000 | 326473 | 120009 | 75000 | 16110 |
| 2491 | 2 | 7   | 500000 | 331065 | 117952 | 75000 | 16074 |
| 2491 | 3 | 28  | 500000 | 332481 | 119947 | 75000 | 14070 |
| 2491 | 4 | 35  | 500000 | 312307 | 108437 | 75000 | 13497 |
| 2491 | 5 | 168 | 500000 | 352448 | 125808 | 75000 | 17688 |
| 2491 | 6 | 175 | 500000 | 338750 | 122524 | 75000 | 19304 |
| 2491 | 7 | 208 | 500000 | 355851 | 124847 | 75000 | 8767  |
| 2624 | 1 | 0   | 120000 | 277691 | 106745 | 75000 | 4245  |
| 2624 | 2 | 7   | 500000 | 328034 | 129485 | 75000 | 12250 |
| 2624 | 3 | 28  | 120000 | 301307 | 104030 | 75000 | 4192  |
| 2624 | 4 | 35  | 500000 | 316346 | 109994 | 75000 | 13632 |
| 2624 | 6 | 175 | 500000 | 249755 | 81514  | 75000 | 15646 |
| 2624 | 7 | 208 | 120000 | 297572 | 99247  | 75000 | 13037 |
| 2954 | 1 | 0   | 500000 | 321396 | 121817 | 75000 | 18159 |
| 2954 | 2 | 7   | 500000 | 317080 | 115104 | 75000 | 13229 |
| 2954 | 3 | 28  | 500000 | 298952 | 103096 | 75000 | 13504 |
| 2954 | 4 | 35  | 500000 | 314153 | 114472 | 75000 | 14418 |
| 2954 | 5 | 168 | 500000 | 293970 | 103834 | 75000 | 18728 |
| 2954 | 6 | 175 | 500000 | 324087 | 119884 | 75000 | 14816 |
| 2954 | 7 | 208 | 500000 | 318612 | 102392 | 75000 | 16058 |
| 2277 | 1 | 0   | 500000 | 342026 | 136140 | 75000 | 7249  |
| 2277 | 2 | 7   | 500000 | 339324 | 107606 | 75000 | 13510 |
| 2277 | 3 | 28  | 500000 | 327746 | 120260 | 75000 | 11884 |
| 2277 | 4 | 35  | 500000 | 269894 | 92774  | 75000 | 10393 |
| 2277 | 5 | 168 | 500000 | 336158 | 118025 | 75000 | 13776 |
| 2277 | 6 | 175 | 500000 | 293158 | 100787 | 75000 | 13210 |
| 2277 | 7 | 208 | 500000 | 315752 | 101956 | 75000 | 10253 |



**Table S2. Summary of sequence data obtained from HBsAg+ and PC sorted samples.**

| <b>Participant ID</b> | <b>Visit</b> | <b>Day</b> | <b>Cell subset</b> | <b>Cell number</b> | <b>Raw sequences</b> | <b>Unique filtered sequences</b> |
|-----------------------|--------------|------------|--------------------|--------------------|----------------------|----------------------------------|
| 2125                  | 2            | 7          | HBsAg+             | 1628               | 59493                | 778                              |
| 2125                  | 3            | 28         | HBsAg+             | 1963               | 333954               | 985                              |
| 2125                  | 4            | 35         | HBsAg+             | 3569               | 38023                | 4582                             |
| 2125                  | 5            | 56         | HBsAg+             | 534                | 304276               | 590                              |
| 2125                  | 6            | 63         | HBsAg+             | 2239               | 28173                | 1736                             |
| 2125                  | 7            | 96         | HBsAg+             | 772                | 343337               | 1146                             |
| 2335                  | 2            | 7          | HBsAg+             | 4956               | 300768               | 4558                             |
| 2335                  | 3            | 28         | HBsAg+             | 1963               | 58977                | 6077                             |
| 2335                  | 4            | 35         | HBsAg+             | 10000              | 269371               | 6702                             |
| 2335                  | 5            | 56         | HBsAg+             | 1363               | 59109                | 1161                             |
| 2335                  | 6            | 63         | HBsAg+             | 3056               | 333485               | 4130                             |
| 2335                  | 7            | 96         | HBsAg+             | 2866               | 53465                | 1371                             |
| 2083                  | 2            | 7          | HBsAg+             | 1840               | 11488                | 2435                             |
| 2083                  | 3            | 28         | HBsAg+             | 2914               | 287257               | 2232                             |
| 2083                  | 4            | 35         | HBsAg+             | 3670               | 70153                | 6435                             |
| 2083                  | 5            | 56         | HBsAg+             | 1365               | 345063               | 1131                             |
| 2083                  | 6            | 63         | HBsAg+             | 1285               | 63585                | 1634                             |
| 2083                  | 7            | 96         | HBsAg+             | 695                | 351756               | 343                              |
| 2752                  | 2            | 7          | HBsAg+             | 1689               | 317723               | 1265                             |
| 2752                  | 3            | 28         | HBsAg+             | 2303               | 56544                | 981                              |
| 2752                  | 4            | 35         | HBsAg+             | 12000              | 344405               | 8401                             |
| 2752                  | 5            | 56         | HBsAg+             | 4260               | 23743                | 6770                             |
| 2752                  | 6            | 63         | HBsAg+             | 3201               | 342352               | 7478                             |
| 2752                  | 7            | 96         | HBsAg+             | 2848               | 47866                | 2114                             |
| 2492                  | 2            | 7          | HBsAg+             | 4337               | 55272                | 8049                             |
| 2492                  | 3            | 28         | HBsAg+             | 5833               | 440076               | 8001                             |
| 2492                  | 4            | 35         | HBsAg+             | 4521               | 29642                | 6210                             |
| 2492                  | 5            | 168        | HBsAg+             | 2339               | 292343               | 149                              |
| 2492                  | 6            | 175        | HBsAg+             | 2545               | 67994                | 5504                             |
| 2492                  | 7            | 208        | HBsAg+             | 3174               | 374457               | 7058                             |
| 2491                  | 2            | 7          | HBsAg+             | 10000              | 291482               | 8239                             |
| 2491                  | 3            | 28         | HBsAg+             | 3139               | 70670                | 6469                             |
| 2491                  | 4            | 35         | HBsAg+             | 7045               | 302927               | 9152                             |
| 2491                  | 5            | 168        | HBsAg+             | 8812               | 48948                | 101                              |
| 2491                  | 6            | 175        | HBsAg+             | 6344               | 405350               | 2565                             |
| 2491                  | 7            | 208        | HBsAg+             | 6687               | 77866                | 7994                             |
| 2624                  | 2            | 7          | HBsAg+             | 8129               | 48770                | 7098                             |

|      |   |     |        |       |        |       |
|------|---|-----|--------|-------|--------|-------|
| 2624 | 3 | 28  | HBsAg+ | 2677  | 516659 | 2365  |
| 2624 | 4 | 35  | HBsAg+ | 7837  | 14744  | 6419  |
| 2624 | 6 | 175 | HBsAg+ | 4699  | 102802 | 6201  |
| 2624 | 7 | 208 | HBsAg+ | 1871  | 14869  | 1633  |
| 2954 | 2 | 7   | HBsAg+ | 9041  | 48523  | 10978 |
| 2954 | 3 | 28  | HBsAg+ | 5673  | 363442 | 10372 |
| 2954 | 4 | 35  | HBsAg+ | 6097  | 8155   | 9985  |
| 2954 | 5 | 168 | HBsAg+ | 4273  | 305422 | 90    |
| 2954 | 6 | 175 | HBsAg+ | 4536  | 3570   | 11975 |
| 2954 | 7 | 208 | HBsAg+ | 7869  | 203874 | 8238  |
| 2277 | 2 | 7   | HBsAg+ | 3912  | 323748 | 6911  |
| 2277 | 3 | 28  | HBsAg+ | 5136  | 278108 | 8402  |
| 2277 | 4 | 35  | HBsAg+ | 8563  | 322579 | 8538  |
| 2277 | 5 | 168 | HBsAg+ | 10000 | 172336 | 130   |
| 2277 | 6 | 175 | HBsAg+ | 7104  | 298652 | 5190  |
| 2277 | 7 | 208 | HBsAg+ | 5312  | 290192 | 7390  |
| 2125 | 2 | 7   | PC     | 912   | 94768  | 4167  |
| 2125 | 4 | 35  | PC     | 1350  | 111820 | 5819  |
| 2125 | 6 | 63  | PC     | 272   | 87461  | 2763  |
| 2335 | 2 | 7   | PC     | 1594  | 102694 | 5526  |
| 2335 | 4 | 35  | PC     | 5603  | 120645 | 6607  |
| 2335 | 6 | 63  | PC     | 364   | 111386 | 4116  |
| 2083 | 2 | 7   | PC     | 130   | 103870 | 1490  |
| 2083 | 4 | 35  | PC     | 350   | 93350  | 2225  |
| 2083 | 6 | 63  | PC     | 143   | 123015 | 896   |
| 2752 | 2 | 7   | PC     | 613   | 95954  | 3942  |
| 2752 | 4 | 35  | PC     | 1814  | 114910 | 4994  |
| 2752 | 6 | 63  | PC     | 420   | 98120  | 3473  |
| 2492 | 2 | 7   | PC     | 626   | 118753 | 3009  |
| 2492 | 4 | 35  | PC     | 2187  | 114854 | 3207  |
| 2492 | 6 | 175 | PC     | 483   | 130166 | 4526  |
| 2491 | 2 | 7   | PC     | 427   | 114667 | 3462  |
| 2491 | 4 | 35  | PC     | 479   | 116859 | 4082  |
| 2491 | 6 | 175 | PC     | 593   | 104336 | 13365 |
| 2624 | 2 | 7   | PC     | 551   | 126379 | 4407  |
| 2624 | 4 | 35  | PC     | 839   | 117360 | 5673  |
| 2624 | 6 | 175 | PC     | 690   | 107392 | 5016  |
| 2954 | 2 | 7   | PC     | 977   | 126511 | 6380  |
| 2954 | 4 | 35  | PC     | 1283  | 118926 | 5984  |
| 2954 | 6 | 175 | PC     | 702   | 112572 | 4754  |
| 2277 | 2 | 7   | PC     | 169   | 75811  | 1997  |

|      |   |     |    |     |        |      |
|------|---|-----|----|-----|--------|------|
| 2277 | 4 | 35  | PC | 262 | 118938 | 3843 |
| 2277 | 6 | 175 | PC | 897 | 116250 | 4484 |

**Table S3. Previously described HBsAg-specific sequences that map to clusters in our dataset.**

| <b>CDR3 AA sequence</b> | <b>Reference</b>                       |
|-------------------------|----------------------------------------|
| CTAGFDYW                | IMGT/LIGM-DB                           |
| CARDLELW                | IMGT/LIGM-DB                           |
| CARGFHYW                | Becker et al. PLoS ONE. 2010           |
| CARGLSGFDYW             | IMGT/LIGM-DB                           |
| CTRKSSSDYW              | Becker et al. PLoS ONE. 2010           |
| CARGGFGEFDYW            | IMGT/LIGM-DB                           |
| CARGTVGYWFDPW           | IMGT/LIGM-DB                           |
| CARDAIAVASDYW           | Tajiri et al. Antiviral Research. 2010 |
| CTRTYSSSWYFDYW          | Becker et al. PLoS ONE. 2010           |
| CAKDIASWYYYGMDVW        | Becker et al. PLoS ONE. 2010           |
| CAKAIASWYYYGMDVW        | Tajiri et al. Antiviral Research. 2010 |
| CAKDISSWYYYGMDVW        | Jin et al. Nature medicine 2009        |
